# Supplementary material for: Is There a Balance in Oxidative-Antioxidant Status in Blood Serum of Patients with Advanced Endometriosis?
Source: MDPI journal article supplement (doi:10.3390/antiox10071097), 2021-07-08
Supplement: s1 [file s1]

**Table S1.** The results of univariate logistic regression models.

| Parameter<br><br>Analyzed effect | TAS                      |         | FRAP                         |         | ALB                       |         | T-BIL                    |         | UA                       |         | IRON                     |         | SIRT3                    |         | SIRT5                    |         | SIRT6                    |         | TE                      |         | AOPP                     |         |
|----------------------------------|--------------------------|---------|------------------------------|---------|---------------------------|---------|--------------------------|---------|--------------------------|---------|--------------------------|---------|--------------------------|---------|--------------------------|---------|--------------------------|---------|-------------------------|---------|--------------------------|---------|
|                                  | OR (95%)                 | p-value | OR (95%)                     | p-value | OR (95%)                  | p-value | OR (95%)                 | p-value | OR (95%)                 | p-value | OR (95%)                 | p-value | OR (95%)                 | p-value | OR (95%)                 | p-value | OR (95%)                 | p-value | OR (95%)                | p-value | OR (95%)                 | p-value |
| E vs. C                          | 0.241<br>(0.022 – 2.598) | 0.241   | 24.744<br>(0.859 – 712.600)  | 0.061   | 1.915<br>(0.660 – 5.560)  | 0.232   | 0.721<br>(0.124 – 4.187) | 0.716   | 1.091<br>(0.586 – 2.032) | 0.784   | 0.999<br>(0.989 – 1.008) | 0.999   | 1.033<br>(0.943 – 1.132) | 0.483   | 1.004<br>(0.891 – 1.132) | 0.943   | 1.029<br>(0.978 – 1.083) | 0.277   | 4.633<br>(1.013–21.187) | 0.048   | 1.018<br>(1.005 – 1.030) | 0.005   |
| III E vs. C                      | 0.184<br>(0.007 – 4.735) | 0.307   | 11.718<br>(0.522 – 263.161)  | 0.121   | 6.873<br>(1.183 – 39.923) | 0.032   | 0.398<br>(0.026 – 6.084) | 0.508   | 1.154<br>(0.611 – 2.180) | 0.659   | 1.007<br>(0.993 – 1.020) | 0.330   | 1.040<br>(0.933 – 1.161) | 0.478   | 1.015<br>(0.887 – 1.162) | 0.826   | 1.010<br>(0.939 – 1.085) | 0.797   | 5.893<br>(1.036–33.527) | 0.046   | 1.015<br>(1.002 – 1.027) | 0.026   |
| IV E vs. C                       | 0.228<br>(0.015 – 3.387) | 0.283   | 30.593<br>(0.670 – 1397.438) | 0.079   | 0.943<br>(0.238 – 3.739)  | 0.933   | 0.887<br>(0.138 – 5.719) | 0.900   | 1.003<br>(0.458 – 2.200) | 0.993   | 0.991<br>(0.978 – 1.004) | 0.168   | 1.028<br>(0.932 – 1.134) | 0.578   | 0.994<br>(0.873 – 1.132) | 0.929   | 1.042<br>(0.983 – 1.104) | 0.165   | 2.984<br>(0.711–12.523) | 0.135   | 1.021<br>(1.006 – 1.036) | 0.006   |
| E vs. NE                         | 0.211<br>(0.030 – 1.499) | 0.120   | 0.383<br>(0.061 – 2.397)     | 0.305   | 1.622<br>(0.731 – 3.600)  | 0.234   | 0.381<br>(0.103 – 1.406) | 0.148   | 1.026<br>(0.693 – 1.519) | 0.897   | 0.998<br>(0.991 – 1.004) | 0.515   | 1.026<br>(0.951 – 1.105) | 0.509   | 0.943<br>(0.847 – 1.051) | 0.288   | 0.992<br>(0.956 – 1.030) | 0.678   | 1.012<br>(0.779–1.315)  | 0.927   | 1.002<br>(0.998 – 1.005) | 0.352   |
| III E vs. NE                     | 6.630<br>(0.121 – 2.676_ | 0.229   | 0.478<br>(0.058 – 3.967)     | 0.494   | 3.297<br>(1.159 – 9.378)  | 0.025   | 0.242<br>(0.034 – 1.733) | 0.158   | 1.069<br>(0.700 – 1.631) | 0.758   | 1.002<br>(0.994 – 1.010) | 0.587   | 1.032<br>(0.938 – 1.135) | 0.515   | 0.957<br>(0.837 – 1.093) | 0.515   | 0.975<br>(0.917 – 1.037) | 0.421   | 0.875<br>(0.517–1.481)  | 0.619   | 1.001<br>(0.997 – 1.005) | 0.593   |
| IV E vs. NE                      | 0.202<br>(0.020 – 2.011) | 0.173   | 0.313<br>(0.030-3.265)       | 0.332   | 0.862<br>(0.309 – 2.405)  | 0.777   | 0.480<br>(0.110 – 2.098) | 0.329   | 0.975<br>(0.616 – 1.542) | 0.912   | 0.994<br>(0.986 – 1.002) | 0.136   | 1.021<br>(0.939 – 1.112) | 0.623   | 0.935<br>(0.821 – 1.065) | 0.310   | 1.001<br>(0.960 – 1.043) | 0.973   | 1.068<br>(0.816–1.398)  | 0.633   | 1.002<br>(0.998 – 1.005) | 0.350   |
| E vs. C+NE                       | 0.201<br>(0.032 – 1.277) | 0.089   | 1.032<br>(0.202 – 5.724)     | 0.970   | 1.840<br>(0.842 – 4.020)  | 0.126   | 0.434<br>(0.121 – 1.559) | 0.200   | 1.038<br>(0.721 – 1.495) | 0.840   | 0.998<br>(0.992 – 1.004) | 0.535   | 1.029<br>(0.962 – 1.099) | 0.407   | 0.969<br>(0.883 – 1.064) | 0.511   | 1.004<br>(0.969 – 1.040) | 0.816   | 1.129<br>(0.872–1.461)  | 0.357   | 1.004<br>(1.000 – 1.007) | 0.043   |

Significant differences ( $p$ -value of less than 0.05) are shown in red bold. C – control group of healthy women, E - endometriosis group, **III E** - group of moderate endometriosis (stage III according to rAFS classification), **IV E** –group of severe endometriosis (stage IV according to rAFS classification), **NE** - non-endometriosis group, **OR** - Odds Ratio.

**Table S2.** Backward stepwise regression after verification of the collinearity of the predictors (parameters).

| Parameters          | Odds Ratio (OR) | 95% Confidence Interval (CI) | <i>p</i> -value |
|---------------------|-----------------|------------------------------|-----------------|
| <b>E vs. C</b>      |                 |                              |                 |
| TAS                 | 0.001           | 0.000 – 0.651                | 0.037           |
| FRAP                | 83534970.264    | 9.901 – 704818378400096.000  | 0.025           |
| AOPP                | 1.017           | 1.002 – 1.032                | 0.028           |
| UA                  | 0.048           | 0.003 – 0.821                | 0.036           |
| <b>III E vs. C</b>  |                 |                              |                 |
| FRAP                | 37.681          | 1.112 – 1265.890             | 0.043           |
| <b>IV E vs. C</b>   |                 |                              |                 |
| Alb                 | 0.001           | 0.000 – 0.743                | 0.040           |
| SIRT6               | 1.132           | 0.999 – 1.282                | 0.052           |
| AOPP                | 1.032           | 1.001 – 1.065                | 0.041           |
| <b>E vs. NE</b>     |                 |                              |                 |
| T-BIL               | 0.043           | 0.002 – 0.781                | 0.033           |
| <b>III E vs. NE</b> |                 |                              |                 |
| <b>NS</b>           |                 |                              |                 |
| <b>IV E vs. NE</b>  |                 |                              |                 |
| AOPP                | 1.009           | 1.001 – 1.017                | 0.026           |
| <b>E vs. C+NE</b>   |                 |                              |                 |
| AOPP                | 1.009           | 1.002 – 1.016                | 0.014           |
| T-BIL               | 0.051           | 0.003 – 0.955                | 0.047           |

Significant differences (*p*-value of less than 0.05) are shown in red bold. C – control group of healthy women, E - endometriosis group, III E- group of moderate endometriosis (stage III according to rAFS classification), IV E –group of severe endometriosis (stage IV according to rAFS classification), NE - non-endometriosis group, OR - Odds Ratio.

**Table S3.** The correlations between concentrations of serum parameters of inflammation and oxidative-antioxidant balance.

| Parameter    | BMI                 | CA 125              | Estradiol          | PRL                 | IgG                 | hs-CRP              | IL-1 $\beta$        | IL-6                | YKL-40             |
|--------------|---------------------|---------------------|--------------------|---------------------|---------------------|---------------------|---------------------|---------------------|--------------------|
| <b>TAS</b>   | r=-0.214<br>p=0.011 | NS                  | NS                 | NS                  | NS                  | NS                  | NS                  | r=0.223<br>p=0.008  | NS                 |
| <b>FRAP</b>  | NS                  | NS                  | NS                 | r=0.221<br>p=0.012  | r=-0.350<br>p<0.001 | r=0.399<br>p<0.001  | r=0.380<br>p<0.001  | r=0.386<br>p<0.001  | NS                 |
| <b>ALB</b>   | NS                  | NS                  | r=0.437<br>p<0.001 | r=-0.183<br>p=0.036 | r=0.594<br>p<0.001  | r=-0.553<br>p<0.001 | r=-0.232<br>p=0.006 | r=-0.453<br>p<0.001 | NS                 |
| <b>T-BIL</b> | NS                  | NS                  | r=0.249<br>p=0.004 | NS                  | r=0.337<br>p<0.001  | r=-0.293<br>p<0.001 | NS                  | r=-0.175<br>p=0.041 | NS                 |
| <b>UA</b>    | NS                  | NS                  | NS                 | NS                  | NS                  | NS                  | r=0.270<br>p=0.001  | NS                  | NS                 |
| <b>IRON</b>  | NS                  | r=-0.294<br>p<0.001 | r=0.217<br>p=0.012 | NS                  | r=0.338<br>p<0.001  | r=-0.540<br>p<0.001 | NS                  | r=-0.438<br>p<0.001 | NS                 |
| <b>SIRT3</b> | NS                  | NS                  | r=0.268<br>p=0.003 | NS                  | r=0.400<br>p<0.001  | r=-0.239<br>p=0.008 | NS                  | r=-0.184<br>p=0.043 | r=0.743<br>p<0.001 |
| <b>SIRT5</b> | NS                  | NS                  | NS                 | NS                  | r=0.275<br>p=0.004  | NS                  | r=0.270<br>p=0.005  | NS                  | r=0.798<br>p<0.001 |
| <b>SIRT6</b> | NS                  | NS                  | NS                 | NS                  | r=0.244<br>p=0.032  | NS                  | r=0.399<br>p<0.001  | NS                  | r=0.829<br>p<0.001 |
| <b>TE</b>    | NS                  | r=0.262<br>p=0.027  | NS                 | r=0.314<br>p=0.005  | r=-0.275<br>p=0.015 | r=0.333<br>p=0.003  | r=0.396<br>p<0.001  | r=0.300<br>p=0.008  | NS                 |
| <b>AOPP</b>  | NS                  | r=0.335<br>p<0.001  | NS                 | NS                  | NS                  | NS                  | NS                  | NS                  | NS                 |

The parameters of oxidative-antioxidant balance were correlated with inflammatory parameters determined by us previously (Kokot et al. [47]). AOPP - advanced protein oxidation products, ALB - albumin, CA-125 - cancer antigen 125, FRAP - ferric reducing antioxidant power, hs-CRP – high sensitive C-reactive protein, IgG – immunoglobulin G, IL-1 $\beta$  – interleukin 1 $\beta$ , IL-6 – interleukin 6, PRL – prolactin, SIRT-3 - sirtuin 3, SIRT-5 - sirtuin 5, SIRT-6 - sirtuin 6, TAS - total antioxidant status, TE – telomerase, T-BIL - total bilirubin, UA - uric acid, YKL-40 - chitinase-3-like protein 1.
